# Supplementary material for: The physiology and habitat of the last universal common ancestor
Source: Springer Nature journal article supplement (doi:10.1038/nmicrobiol.2016.116), 2016-07-25
Supplement: 41564_2016_BFnmicrobiol2016116_MOESM151_ESM.pdf [file 41564_2016_BFnmicrobiol2016116_MOESM151_ESM.pdf]

# The physiology and habitat of the last universal common ancestor

Madeline C. Weiss\*, Filipa L. Sousa\*, Natalia Mrnjavac, Sinje Neukirchen, Mayo Roettger,  
Shijulal Nelson-Sathi, William F. Martin<sup>‡</sup>

Institute of Molecular Evolution

Heinrich Heine University Düsseldorf

Universitätsstraße 1

40225 Düsseldorf, Germany

\* equal contribution

<sup>‡</sup> bill@hhu.de

## Supplementary Information

### Supplementary Figures

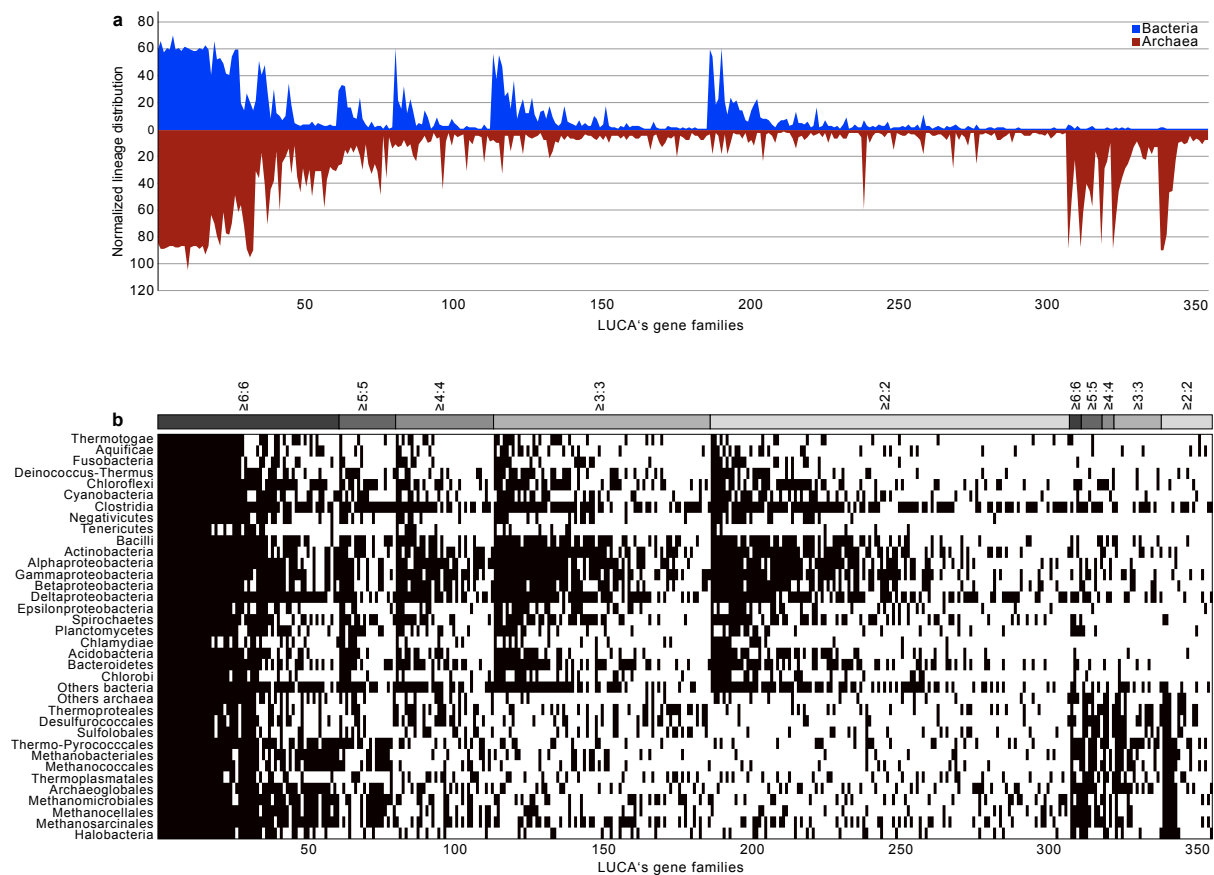

**Supplementary Fig. 1 – Archaeal and bacterial lineage distributions within LUCA's 355 gene families.** a) Normalized lineage distribution for bacterial (blue) and archaeal (red) organisms present in each of the 355 LUCA's gene families (x-axis). Families (clusters) where one of the domains is overrepresented  $\geq 20:1$  (308 to 355) are sorted on the right side of panel a). The preponderance of archaeal versus bacterial sequences for these 48 proteins is likely due to the small archaeal sample (fewer detectable interdomain LGTs), though, none of these 48 are shown in Fig. 3. b) Taxonomic group representation (y-axis) of the organisms represented within LUCA's 355 gene families (x-axis) sorted by the number of bacterial and archaeal groups represented (top). Black ticks indicate gene presence in a given taxonomic group. The two identified groups of clusters were first sorted according to the number of bacterial and archaeal groups present (top) and then sorted by the total number of taxonomic groups present.

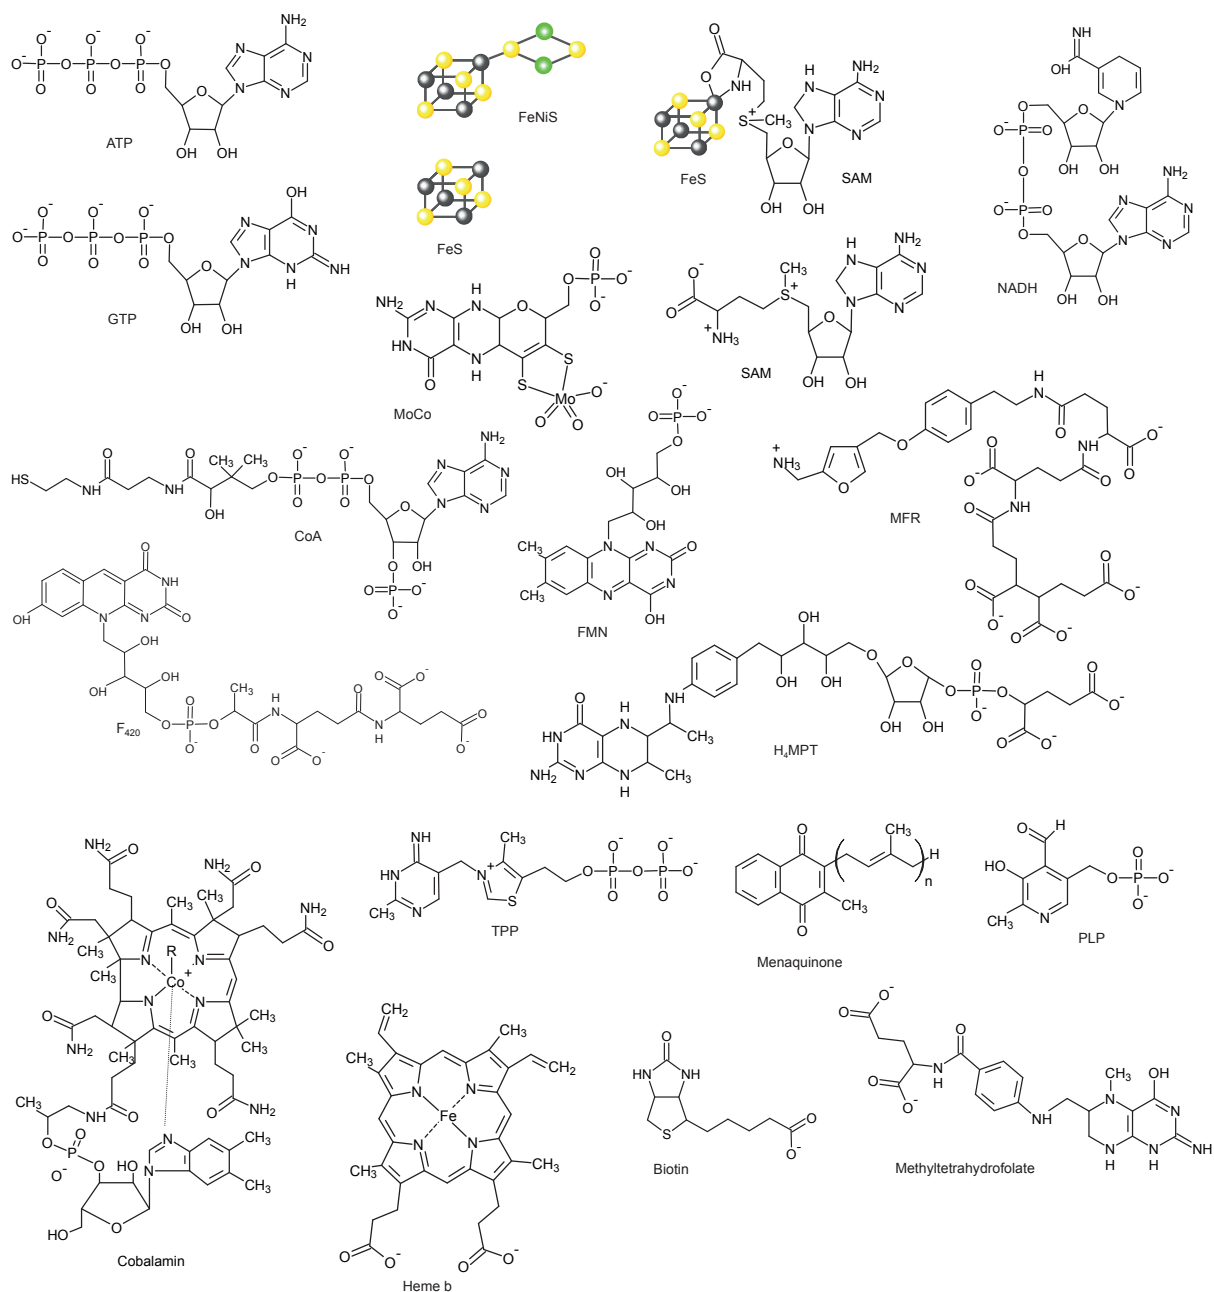

**Supplementary Fig. 2 – Structures of the cofactors found in LUCA’s protein set.** SAM is shown both in free form and bound to an FeS cluster, which is the form encountered in radical SAM enzymes. Cobalamin was chosen as representative of corrin-based cofactors, menaquinone as representative of quinone cofactors, FMN as representative of flavins, MoCo as representative of molybdopterin-based cofactors, and heme b as representative of heme cofactors. NADPH is not shown as it differs from NADH in one phosphate group attached to the 2'-O of the ribose ring. Mononuclear metal centers (Fe and Cu) and the non-standard amino acid selenocysteine are not shown, nor are small protein electron carriers such as ferredoxin or rubredoxin. NTP is also listed as a cofactor, but not shown here as it stands for any of the nucleoside triphosphates in those cases when it's not known which one is bound by the enzyme, or when more than one nucleoside triphosphate can be used. Abbreviations: FeNiS – nickel-iron-sulfur cluster; FeS – iron-sulfur cluster; MoCo – molybdenum cofactor; SAM – S-adenosylmethionine; CoA – coenzyme A; MFR – methanofuran; H<sub>4</sub>MPT – tetrahydromethanopterin; TPP - thiamine pyrophosphate; PLP - pyridoxal phosphate; NTP – nucleoside triphosphate.

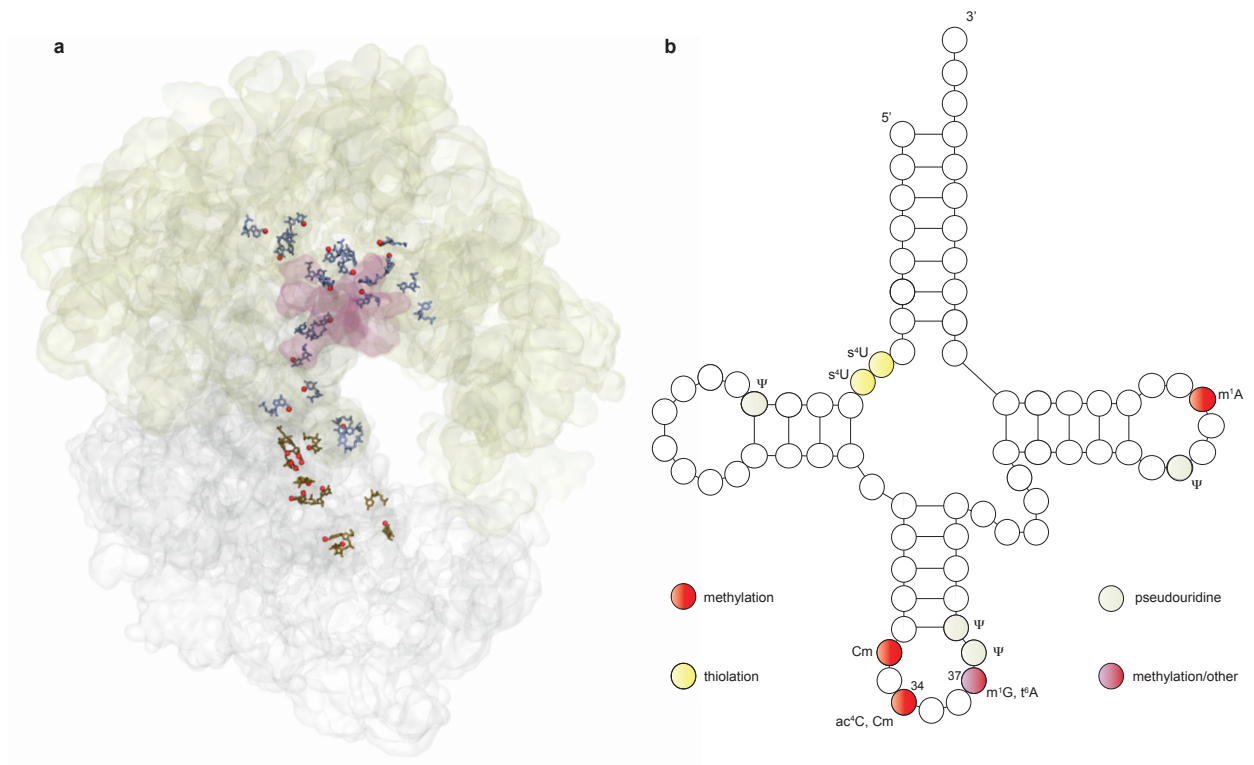

**Supplementary Fig. 3 – Modified nucleosides and the genetic code.** a) Structure of the *E. coli* ribosome<sup>1</sup> (PDB ID: 4YBB), with the large and small subunits shown in green and silver, respectively. The peptidyl-transferase site is shaded pink<sup>2,3</sup>. The modified nucleosides of 23S rRNA are depicted in icy blue, while in 16S rRNA they are ochre. Modification of C2501 to 5-hydroxycytidine is not present in the structure. Methyl group carbons are shown as red balls. b) Cloverleaf secondary structure representation of tRNA showing only those posttranscriptional nucleoside modifications that are conserved among bacteria and archaea in both identity and position (see Methods). The presence of 5-methoxyuridine at position 34 in archaea has been disputed and is hence not shown<sup>4</sup>. Abbreviations as in Fig. 4.

## Supplementary Tables

**Supplementary Table 1. Cofactors in LUCA's proteins**

| Transition metal-based cofactors and redox electron carriers in LUCA's proteome |                          |            |           |                     |                   |                 |          |                  |          |          |
|---------------------------------------------------------------------------------|--------------------------|------------|-----------|---------------------|-------------------|-----------------|----------|------------------|----------|----------|
| Functional category                                                             | Proteins tracing to LUCA | Cofactors* |           |                     |                   |                 |          |                  |          |          |
|                                                                                 |                          | FeS        | NAD(P)    | Flavin <sup>†</sup> | MoCo <sup>‡</sup> | Fd <sup>§</sup> | Corrin   | F <sub>420</sub> | FeNiS    | Heme     |
| <b>Information</b>                                                              |                          |            |           |                     |                   |                 |          |                  |          |          |
| Ribosome biogenesis                                                             | 19                       | -          | -         | -                   | -                 | -               | -        | -                | -        | -        |
| Translation                                                                     | 12                       | -          | -         | -                   | -                 | -               | -        | -                | -        | -        |
| RNA modification                                                                | 8                        | 1          | 1         | -                   | -                 | -               | -        | -                | -        | -        |
| DNA binding                                                                     | 15                       | 1          | -         | -                   | -                 | -               | -        | -                | -        | -        |
| Nucleic acid handling                                                           | 17                       | -          | -         | -                   | -                 | -               | -        | -                | -        | -        |
| <b>Physiology</b>                                                               |                          |            |           |                     |                   |                 |          |                  |          |          |
| Energy metabolism                                                               | 2                        | -          | -         | -                   | -                 | -               | -        | -                | -        | -        |
| Carbon assimilation                                                             | 13                       | 7          | -         | 2                   | 2                 | 2               | 4        | 3                | 2        | -        |
| Nitrogen assimilation                                                           | 7                        | 4          | 1         | 1                   | 3                 | 4               | -        | -                | -        | -        |
| Cofactor biosynthesis                                                           | 19                       | 4          | 3         | 1                   | 1                 | -               | -        | -                | -        | -        |
| Nucleotide metabolism                                                           | 11                       | 1          | -         | 1                   | -                 | -               | -        | -                | -        | -        |
| Amino acid metabolism                                                           | 10                       | -          | 1         | -                   | -                 | -               | -        | -                | -        | -        |
| Redox chemistry                                                                 | 26                       | 11         | 9         | 8                   | 4                 | 2               | -        | 1                | 1        | 1        |
| Protein modification                                                            | 2                        | -          | -         | -                   | -                 | -               | -        | -                | -        | -        |
| Lipid metabolism                                                                | 10                       | -          | 2         | 1                   | -                 | -               | -        | -                | -        | -        |
| Sugar-related                                                                   | 18                       | -          | 1         | -                   | -                 | -               | -        | -                | -        | -        |
| Cellular                                                                        | 31                       | 1          | -         | -                   | -                 | -               | -        | -                | -        | -        |
| Cell wall related                                                               | 7                        | -          | -         | -                   | -                 | -               | -        | -                | -        | -        |
| Transport                                                                       | 52                       | -          | 1         | -                   | -                 | -               | -        | -                | -        | -        |
| Others                                                                          | 7                        | -          | -         | -                   | -                 | -               | -        | -                | -        | -        |
| Unknown & uncharacterized                                                       | 61                       | 2          | 1         | 1                   | -                 | -               | 1        | -                | -        | -        |
| Oxygen                                                                          | 8                        | 1          | 2         | 1                   | -                 | -               | -        | -                | -        | 2        |
| <b>Total</b>                                                                    | <b>355</b>               | <b>33</b>  | <b>22</b> | <b>16</b>           | <b>10</b>         | <b>8</b>        | <b>5</b> | <b>4</b>         | <b>3</b> | <b>3</b> |

Other (mostly group transfer) cofactors in LUCA's proteome

| Functional category       | Proteins tracing to LUCA | Cofactors* |                   |           |           |                    |          |                  |          |
|---------------------------|--------------------------|------------|-------------------|-----------|-----------|--------------------|----------|------------------|----------|
|                           |                          | ATP        | SAM <sup>  </sup> | CoA       | GTP       | H <sub>4</sub> MPT | NTP      | Sec <sup>¶</sup> | MFR      |
| <b>Information</b>        |                          |            |                   |           |           |                    |          |                  |          |
| Ribosome biogenesis       | 19                       | 1          | -                 | 3         | 4         | -                  | 1        | -                | -        |
| Translation               | 12                       | 9          | -                 | -         | 2         | -                  | -        | -                | -        |
| RNA modification          | 8                        | 1          | 4                 | -         | -         | -                  | -        | -                | -        |
| DNA binding               | 15                       | -          | 1                 | -         | -         | -                  | -        | -                | -        |
| Nucleic acid handling     | 17                       | 7          | -                 | -         | 1         | -                  | -        | 1                | -        |
| <b>Physiology</b>         |                          |            |                   |           |           |                    |          |                  |          |
| Energy metabolism         | 2                        | -          | -                 | -         | -         | -                  | -        | -                | -        |
| Carbon assimilation       | 13                       | 2          | -                 | 2         | -         | 4                  | -        | -                | 2        |
| Nitrogen assimilation     | 7                        | 6          | -                 | -         | -         | -                  | -        | -                | -        |
| Cofactor biosynthesis     | 19                       | 3          | 4                 | -         | -         | -                  | -        | -                | -        |
| Nucleotide metabolism     | 11                       | 2          | 1                 | -         | -         | -                  | -        | -                | -        |
| Amino acid metabolism     | 10                       | 2          | -                 | 2         | -         | -                  | -        | -                | -        |
| Redox chemistry           | 26                       | -          | -                 | -         | -         | -                  | -        | 1                | -        |
| Protein modification      | 2                        | 1          | -                 | -         | 1         | -                  | -        | -                | -        |
| Lipid metabolism          | 10                       | -          | -                 | 5         | -         | -                  | -        | -                | -        |
| Sugar-related             | 18                       | 1          | -                 | -         | -         | -                  | -        | -                | -        |
| Cellular                  | 31                       | 7          | 1                 | 1         | 3         | -                  | -        | -                | -        |
| Cell wall related         | 7                        | -          | -                 | -         | -         | -                  | -        | -                | -        |
| Transport                 | 52                       | 24         | -                 | -         | -         | -                  | -        | -                | -        |
| Others                    | 7                        | 2          | 1                 | -         | -         | -                  | -        | 1                | -        |
| Unknown & uncharacterized | 61                       | 1          | 3                 | 1         | 2         | -                  | 2        | -                | -        |
| Oxygen                    | 8                        | -          | -                 | -         | -         | -                  | -        | -                | -        |
| <b>Total</b>              | <b>355</b>               | <b>69</b>  | <b>15</b>         | <b>14</b> | <b>13</b> | <b>4</b>           | <b>3</b> | <b>3</b>         | <b>2</b> |

\* Cofactors occurring only in one protein family or present exclusively in oxygen-related protein families are not shown (see Methods). Abbreviations: FeS – iron-sulfur cluster, SAM – S-adenosylmethionine, CoA – coenzyme A, MoCo – molybdenum cofactor, FeMoCo – iron-molybdenum cofactor, Fd – ferredoxin, H<sub>4</sub>MPT – tetrahydromethanopterin, FeNiS – nickel-iron-sulfur cluster, Sec – selenocysteine, NTP – nucleoside triphosphate, MFR – methanofuran.

<sup>†</sup> FMN and FAD were counted as flavin. <sup>‡</sup> FeMoCo and tungsten-based pterins were counted as MoCo.

<sup>§</sup> Ferredoxin, flavodoxin or methanophenazine were counted as Fd.

<sup>||</sup> Out of the 15 SAM dependent enzymes, 7 are radical SAM enzymes, 6 are non-radical, 1 uses decarboxylated SAM (dcSAM) as aminopropyl group donor, and 1 is uncharacterized.

<sup>¶</sup> Selenium was listed in the table due to its potential catalytic role in selenoenzymes (see Methods).

**Supplementary Table 2. Functional and taxonomic characterization of the 355 protein families potentially present in LUCA using a threshold of 25% global identity. (\*provided as separate Excel file)**

**Supplementary Table 3.  $\chi^2$  test of independence**

| Lineage distribution  | LUCA's 355 gene families (%) | 11,093 protein families (%) |
|-----------------------|------------------------------|-----------------------------|
| Archaeoglobales       | 0.39                         | 0.25                        |
| Desulfurococcales     | 0.77                         | 0.47                        |
| Halobacteria          | 2.17                         | 1.74                        |
| Methanobacteriales    | 0.67                         | 0.44                        |
| Methanocellales       | 0.35                         | 0.23                        |
| Methanococcales       | 0.94                         | 0.73                        |
| Methanomicrobiales    | 0.68                         | 0.45                        |
| Methanosarcinales     | 1.15                         | 0.77                        |
| Sulfolobales          | 0.73                         | 0.95                        |
| Thermo-Pyrococcales   | 1.18                         | 0.75                        |
| Thermoplasmatales     | 0.29                         | 0.18                        |
| Thermoproteales       | 0.99                         | 0.61                        |
| Other archaea         | 0.21                         | 0.14                        |
| Acidobacteria         | 0.73                         | 0.52                        |
| Actinobacteria        | 11.91                        | 11.51                       |
| Alphaproteobacteria   | 10.38                        | 9.86                        |
| Aquificae             | 0.58                         | 0.40                        |
| Bacilli               | 9.53                         | 13.99                       |
| Bacteroidetes         | 4.34                         | 3.38                        |
| Betaproteobacteria    | 8.35                         | 7.87                        |
| Chlamydiae            | 0.35                         | 0.58                        |
| Chlorobi              | 0.84                         | 0.55                        |
| Chloroflexi           | 1.31                         | 0.98                        |
| Clostridia            | 7.62                         | 6.30                        |
| Cyanobacteria         | 2.61                         | 2.09                        |
| Deinococcus-Thermus   | 1.18                         | 0.92                        |
| Deltaproteobacteria   | 4.45                         | 3.23                        |
| Epsilonproteobacteria | 1.56                         | 2.12                        |
| Fusobacteria          | 0.31                         | 0.21                        |
| Gammaproteobacteria   | 17.21                        | 23.20                       |
| Negativicutes         | 0.43                         | 0.28                        |
| Planctomycetes        | 0.47                         | 0.33                        |
| Spirochaetes          | 1.63                         | 1.42                        |
| Tenericutes           | 0.50                         | 0.45                        |
| Thermotogae           | 1.14                         | 0.73                        |
| Other bacteria        | 2.04                         | 1.37                        |
| <i>P-value</i>        | 0.87                         |                             |

**Functional classification**

| COG distribution     | LUCA's 355 gene families | 11,093 clusters |
|----------------------|--------------------------|-----------------|
| Information          | 62                       | 865             |
| Metabolism           | 133                      | 3127            |
| Cellular             | 52                       | 3793            |
| Poorly characterised | 58                       | 1779            |
| Not declared         | 50                       | 1529            |
| <i>P-value</i>       | << 10 <sup>-16</sup>     |                 |

$\chi^2$  test of independence between the LUCA's 355 candidate gene families and the 11,093 protein families containing archaeal and bacterial homologues with regard to their lineage and to their functional (COG) distribution. For the  $\chi^2$  test, the absolute numbers of families, not their proportions were used.

**Supplementary Table 4. Subset of LUCA's proteins (RNA modification, energy metabolism, C and N assimilation) and respective cofactors**

| Proteins                                                                            | Cofactors                                           |
|-------------------------------------------------------------------------------------|-----------------------------------------------------|
| <b>RNA modification</b>                                                             |                                                     |
| tRNA U55 pseudouridine synthase TruB                                                | -                                                   |
| tRNA C32,U32 (ribose-2'-O)-methylase TrmJ or a related methyltransferase            | SAM                                                 |
| tRNA U38,U39,U40 pseudouridine synthase TruA                                        | -                                                   |
| tRNA A37 threonylcarbamoyltransferase TsaD                                          | ATP                                                 |
| RNA:NAD 2'-phosphotransferase, TPT1/KptA family                                     | NAD                                                 |
| 23S rRNA G2069 N7-methylase RlmK or C1962 C5-methylase RlmI                         | SAM                                                 |
| 16S rRNA C967 or C1407 C5-methylase, RsmB/RsmF family                               | SAM                                                 |
| tRNA/tmRNA/rRNA uracil-C5-methylase, TrmA/RlmC/RlmD family                          | SAM, FeS                                            |
| <b>Energy metabolism</b>                                                            |                                                     |
| Archaeal/vacuolar-type H <sup>+</sup> -ATPase subunit I/STV1                        | -                                                   |
| BioD-like N-terminal domain of phosphotransacetylase                                | -                                                   |
| <b>Carbon assimilation</b>                                                          |                                                     |
| CO dehydrogenase/acetyl-CoA synthase delta subunit (corrinoid Fe-S protein)*        | FeS [2x], corrinoid cofactor [2x], FeNiS            |
| CO dehydrogenase/acetyl-CoA synthase gamma subunit (corrinoid Fe-S protein) [2x]*,† | FeS [2x], corrinoid cofactor [2x], FeNiS            |
| CO or xanthine dehydrogenase, Mo-binding subunit                                    | MoCo                                                |
| Formylmethanofuran dehydrogenase subunit A*                                         | MFR, H <sub>4</sub> MPT, FeS, MoCo                  |
| Formylmethanofuran dehydrogenase subunit C*                                         | MFR, H <sub>4</sub> MPT, FeS, MoCo                  |
| Formylmethanofuran:tetrahydromethanopterin formyltransferase                        | MFR, H <sub>4</sub> MPT                             |
| Coenzyme F <sub>420</sub> -reducing hydrogenase, beta subunit [2x]†                 | FeS, F <sub>420</sub> , flavin, Fd/methanophenazine |
| Methenyltetrahydromethanopterin cyclohydrolase                                      | H <sub>4</sub> MPT                                  |
| Flavin-dependent oxidoreductase, luciferase family                                  | F <sub>420</sub> , H <sub>4</sub> MPT               |
| Acetyl-coenzyme A synthetase                                                        | (ATP, CoA)                                          |
| Acyl-coenzyme A synthetase/AMP-(fatty) acid ligase                                  | (ATP, CoA)                                          |
| <b>Nitrogen assimilation</b>                                                        |                                                     |
| Nitrogenase molybdenum-iron protein, alpha and beta chains [2x]†                    | FeS, FeMoCo, ATP, Fd                                |
| Nitrogenase subunit NifH, an ATPase (fusion)                                        | FeS, FeMoCo, Fd/flavodoxin, ATP                     |
| Nitrogenase subunit NifH, an ATPase                                                 | FeS, Fd/flavodoxin, ATP                             |
| Glutamine synthetase                                                                | ATP                                                 |
| Nitroreductase                                                                      | flavin, NAD(P)                                      |
| ADP-ribosylglycohydrolase                                                           | ATP                                                 |

\* In case of protein complexes, the cofactors of the entire complex are shown next to each of the subunits of the complex. Exceptionally, when the subunit couldn't be pinpointed to a specific protein complex with certainty, only the cofactors of that subunit are shown.

† When a subunit of a protein complex appears twice, it is scored as presence of an additional copy of that complex, with the associated cofactors.

Abbreviations used as in Supplementary Table 1.

**Supplementary Table 5. Subset of LUCA's proteins (cofactor biosynthesis and redox chemistry) and respective cofactors**

| Proteins                                                                                         | Cofactors                  |
|--------------------------------------------------------------------------------------------------|----------------------------|
| <b>Cofactor biosynthesis</b>                                                                     |                            |
| F <sub>420</sub> -0:Gamma-glutamyl ligase (F <sub>420</sub> biosynthesis)                        | -                          |
| Molybdenum cofactor biosynthesis enzyme                                                          | -                          |
| Molybdenum cofactor biosynthesis enzyme MoaA                                                     | SAM, FeS [2x]              |
| Molybdopterin biosynthesis enzyme                                                                | MoCo                       |
| Dihydropteroate synthase                                                                         | -                          |
| Glutamyl-tRNA reductase                                                                          | NAD(P)                     |
| Mg-chelatase subunit ChlD <sup>a</sup>                                                           | ATP                        |
| Siroheme synthase (precorrin-2 oxidase/ferrochelatase domain) <sup>a</sup>                       | SAM, NAD(P)                |
| Sirohydrochlorin ferrochelatase                                                                  | FeS                        |
| Precorrin-6B methylase 1                                                                         | SAM                        |
| Protoporphyrinogen oxidase (anaerobic)                                                           | flavin, menaquinone        |
| 2-iminoacetate synthase ThiH (thiamine biosynthesis)                                             | SAM, FeS, NAD(P)           |
| Sulfofuryl decarboxylase, TPP-binding subunit (coenzyme M biosynthesis) <sup>*</sup>             | TPP                        |
| Archaeal 2-phospho-L-lactate transferase CofD/UPF0052 family                                     | -                          |
| Gamma-glutamyl:cysteine ligase YbdK, ATP-grasp superfamily                                       | ATP                        |
| Glutathione synthase/RimK-type ligase, ATP-grasp superfamily                                     | ATP                        |
| Predicted Fe-Mo cluster-binding protein, NifX family                                             | -                          |
| 4-hydroxybenzoate polyprenyltransferase                                                          | -                          |
| hypothetical protein (Uro-D domain)                                                              | -                          |
| <b>Redox chemistry</b>                                                                           |                            |
| Sulfur relay (sulfurtransferase) protein, DsrC/TusE family                                       | -                          |
| Rieske Fe-S protein                                                                              | FeS                        |
| Archaeal flavoprotein                                                                            | flavin                     |
| Aldehyde:ferredoxin oxidoreductase [2x]                                                          | FeS, MoCo, Fd              |
| Fe-S oxidoreductase                                                                              | FeS                        |
| Fe-S-cluster-containing dehydrogenase component                                                  | FeS                        |
| FMN-dependent dehydrogenase                                                                      | flavin, NAD(P)             |
| Formate hydrogenlyase subunit 6/NADH:UQ oxidoreductase 23 kD subunit (chain I) <sup>*</sup>      | FeS                        |
| Electron transfer flavoprotein, alpha subunit                                                    | flavin                     |
| Glycerol dehydrogenase or related enzyme, iron-containing ADH family                             | -                          |
| Predicted oxidoreductase (related to aryl-alcohol dehydrogenase)                                 | NAD(P)                     |
| Predicted oxidoreductase of the aldo/keto reductase family                                       | FeS, NAD(P)                |
| NADH dehydrogenase, FAD-containing subunit <sup>*</sup>                                          | flavin                     |
| Ni,Fe-hydrogenase I small subunit <sup>*</sup>                                                   | FeS, FeNiS, flavin, NAD(P) |
| Choline dehydrogenase or related flavoprotein                                                    | flavin, NAD(P)             |
| Anaerobic SeCys-containing dehydrogenase                                                         | MoCo                       |
| Protein distantly related to bacterial ferritins                                                 | heme                       |
| Thioredoxin reductase                                                                            | flavin, NAD(P)             |
| MinD superfamily P-loop ATPase, contains an inserted ferredoxin domain                           | FeS                        |
| Cytochrome c biogenesis protein CcdA (sulfhydryl redox chemistry)                                | -                          |
| Nitroimidazol reductase NimA, FMN-containing flavoprotein, pyridoxamine 5'-P oxidase superfamily | flavin                     |
| Predicted dinucleotide-binding enzyme                                                            | F <sub>420</sub> , NAD(P)  |
| Tetrathionate reductase subunit A <sup>*</sup>                                                   | FeS, MoCo, Sec             |
| Oxidoreductase domain-containing protein                                                         | NAD(P)                     |
| 4Fe-4S ferredoxin                                                                                | FeS                        |

<sup>\*</sup> In case of protein complexes, the cofactors of the entire complex are shown next to each of the subunits of the complex. Exceptionally, when the subunit couldn't be pinpointed to a specific protein complex with certainty, only the cofactors of that subunit are shown. Abbreviations used as in Supplementary Table 1.



**Supplementary Table 6. Archaea and bacteria basal branching lineages within the 355 phylogenetic trees of LUCA's gene families.**

| proxy                              | Archaea                                                                                  | no. | Bacteria                                        | no. |
|------------------------------------|------------------------------------------------------------------------------------------|-----|-------------------------------------------------|-----|
| Tree <sub>Pure</sub> <sup>*</sup>  | Other archaea                                                                            | 18  | Clostridia                                      | 30  |
|                                    | Methanomicrobiales                                                                       | 13  | Deltaproteobacteria/Other bacteria <sup>§</sup> | 18  |
|                                    | Methanosarcinales/Thermoplasmatales/<br>Thermoproteales/Thermo-Pyrococcales <sup>§</sup> | 12  | Actinobacteria                                  | 12  |
|                                    | Archaeoglobales                                                                          | 10  | Chloroflexi                                     | 8   |
|                                    | Methanococcales                                                                          | 9   | Cyanobacteria/Gammaproteobacteria <sup>§</sup>  | 7   |
| Tree <sub>Mixed</sub> <sup>†</sup> | Methanosarcinales/Archaeoglobales <sup>§</sup>                                           | 54  | Clostridia                                      | 82  |
|                                    | Methanomicrobiales/Thermoplasmatales <sup>§</sup>                                        | 47  | Other bacteria                                  | 72  |
|                                    | Methanobacteriales/Methanocellales <sup>§</sup>                                          | 46  | Deltaproteobacteria                             | 57  |
|                                    | Halobacteria                                                                             | 45  | Actinobacteria                                  | 48  |
|                                    | Methanococcales                                                                          | 43  | Bacilli                                         | 38  |
| Dist <sub>Root</sub> <sup>‡</sup>  | Methanosarcinales                                                                        | 48  | Clostridia                                      | 87  |
|                                    | Thermo-Pyrococcales                                                                      | 47  | Other bacteria                                  | 42  |
|                                    | Methanococcales                                                                          | 40  | Deltaproteobacteria                             | 32  |
|                                    | Thermoproteales                                                                          | 34  | Chloroflexi                                     | 22  |
|                                    | Archaeoglobales                                                                          | 33  | Gammaproteobacteria                             | 21  |

\* representatives from only one phylum/group in the basal branch.

† representatives from more than one phylum/group in the basal branch.

‡ the number of trees in which a representative from the group indicated had the shortest distance to the root.

§ groups represented equal number of times in the basal branch.

With respect to the phylogenetic position of the deepest branching lineages, the available taxon sample introduces a potential bias in the case of methanogens, which are overrepresented in the archaeal taxon sample (31.34% of archaeal genomes) but certainly not in the case of acetogens, which are not overrepresented in the sample (3.68% of bacterial genomes). In addition, Thaumarchaeota and other new archaeal phyla not belonging to the Eury- or Crenarchaeota are underrepresented in the present genome sample. This sampling bias reduces the number of archaea fulfilling both the monophyly and two phylum criteria.

**Supplementary Table 7. SAM-dependent enzymes.** (\*provided as separate Excel file)

**Supplementary Table 8. Functional and taxonomic characterization of one taxa misplaced protein families.** (\*provided as separate Excel file)

**Supplementary Table 9. Functional and taxonomic characterization of one phyla misplaced protein families.** (\*provided as separate Excel file)

## Supplementary Information References

1. Noeske, J. *et al.* High-resolution structure of the *Escherichia coli* ribosome. *Nat. Struct. Mol. Biol.* **22**, 336–341 (2015).
2. Ramakrishnan, V. Ribosome structure and the mechanism of translation. *Cell* **108**, 557–572 (2002).
3. Sato, N. S., Hirabayashi, N., Agmon, I., Yonath, A. & Suzuki T. Comprehensive genetic selection revealed essential bases in the peptidyl-transferase center. *Proc. Natl. Acad. Sci. USA* **103**, 15386–15391 (2006).
4. Grosjean, H., Gaspin, C., Marck, C., Decatur, W. A. & de Crécy-Lagard, V. RNomics and modomics in the halophilic archaea *Haloferax volcanii*: identification of RNA modification genes. *BMC Genomics* **9**, 470 (2008).
5. Arragain, S. *et al.* Identification of eukaryotic and prokaryotic methylthiotransferase for biosynthesis of 2-methylthio-N<sup>6</sup>-threonylcarbamoyladenine in tRNA. *J. Biol. Chem.* **285**, 28425–28433 (2010).
6. Pierrel, F., Hernandez, H. L., Johnson, M.K., Fontecave, M. & Atta, M. MiaB Protein from *Thermotoga maritima*. Characterization of an extremely thermophilic tRNA-methylthiotransferase. *J. Biol. Chem.* **278**, 29515–29524 (2003).
7. Dowling, D. P. *et al.* Radical SAM enzyme QueE defines a new minimal core fold and metal-dependent mechanism. *Nat. Chem. Biol.* **10**, 106–112 (2013).
8. Ahn, H. J. *et al.* Crystal structure of tRNA (m<sup>1</sup>G37) methyltransferase: Insights into tRNA recognition. *EMBO J.* **22**, 2593–2603 (2003).
9. Anton, B. P. *et al.* Functional characterization of the YmcB and YqeV tRNA methylthiotransferases of *Bacillus subtilis*. *Nucleic Acids Res.* **38**, 6195–6205 (2010).
10. Noma, A., Kirino, Y., Ikeuchi, Y. & Suzuki, T. Biosynthesis of wybutosine, a hyper-modified nucleoside in eukaryotic phenylalanine tRNA. *EMBO J.* **25**, 2142–2154 (2006).
11. Constantinesco, F., Benachenhou, N., Motorin, Y. & Grosjean, H. The tRNA(guanine-26,N<sup>2</sup>-N<sup>2</sup>) methyltransferase (Trm1) from the hyperthermophilic archaeon *Pyrococcus furiosus*: Cloning, sequencing of the gene and its expression in *Escherichia coli*. *Nucleic Acids Res.* **26**, 3753–3761 (1998).
12. Golovina, A. Y. *et al.* The yfiC gene of *E. coli* encodes an adenine-N<sup>6</sup> methyltransferase that specifically modifies A37 of tRNA<sub>1<sup>Val</sup></sub>(cmo<sup>5</sup>UAC). *RNA* **15**, 1134–1141 (2009).

13. Walbott, H., Leulliot, N., Grosjean, H. & Golinelli-Pimpaneau, B. The crystal structure of *Pyrococcus abyssi* tRNA (uracil-54, C5)-methyltransferase provides insights into its tRNA specificity. *Nucleic Acids Res.* **36**, 4929–4940 (2008).
14. Byszewska, M., Śmietański, M., Purta, E. & Bujnicki, J. M. RNA methyltransferases involved in 5' cap biosynthesis. *RNA Biol.* **11**, 1597–1607 (2015).
15. Zamudio, J. R. *et al.* Complete cap 4 formation is not required for viability in *Trypanosoma brucei*. *Eukaryot. Cell* **5**, 905–915 (2006).
16. Caldas, T. *et al.* The FtsJ/RrmJ heat shock protein of *Escherichia coli* is a 23S ribosomal RNA methyltransferase. *J. Biol. Chem.* **275**, 16414–16419 (2000).
17. Romanowski, M. J., Bonanno, J. B. & Burley, S. K. Crystal structure of the *Escherichia coli* glucose-inhibited division protein B (GidB) reveals a methyltransferase fold. *Proteins* **47**, 563–567 (2002).
18. Tscherne, J. S., Nurse, K., Popienick, P. & Ofengand, J. Purification, cloning & characterization of the 16 sRNA m<sup>2</sup>G1207 methyltransferase from *Escherichia coli*. *J. Biol. Chem.* **274**, 924–929 (1999).
19. Lesnyak, D. V., Sergiev, P. V., Bogdanov, A. A. & Dontsova, O. A. Identification of *Escherichia coli* m<sup>2</sup>G methyltransferases: I. the *ycbY* gene encodes a methyltransferase specific for G2445 of the 23 S rRNA. *J. Mol. Biol.* **364**, 20–25 (2006).
20. Zhang, H. *et al.* Structural insights into the function of 23S rRNA methyltransferase RlmG (m<sup>2</sup>G1835) from *Escherichia coli*. *RNA* **18**, 1500–1509 (2012).
21. Foster, P. G., Nunes, C. R., Greene, P., Moustakas, D. & Stroud, R. M. The first structure of an RNA m<sup>5</sup>C methyltransferase, Fmu, provides insight into catalytic mechanism and specific binding of RNA substrate. *Structure* **11**, 1609–1620 (2003).
22. Hallberg, B. M. *et al.* The structure of the RNA m<sup>5</sup>C methyltransferase YebU from *Escherichia coli* reveals a C-terminal RNA-recruiting PUA domain. *J. Mol. Biol.* **360**, 774–787 (2006).
23. O'Farrell, H. C., Scarsdale, J. N. & Rife, J. P. Crystal structure of KsgA, a universally conserved rRNA adenine dimethyltransferase in *Escherichia coli*. *J. Mol. Biol.* **339**, 337–353 (2004).
24. Sergiev, P. V., Serebryakova, M. V., Bogdanov, A. A. & Dontsova, O. A. The *ybiN* gene of *Escherichia coli* encodes adenine-N<sup>6</sup> methyltransferase specific for modification of A1618 of 23 S ribosomal RNA, a methylated residue located close to the ribosomal exit tunnel. *J. Mol. Biol.* **375**, 291–300 (2008).
25. Purta, E., O'Connor, M., Bujnicki, J. M. & Douthwaite, S. YgdE is the 2'-O-ribose

- methyltransferase RlmM specific for nucleotide C<sup>2498</sup> in bacterial 23S rRNA. *Mol. Microbiol.* **72**, 1147–1158 (2009).
26. Das, K. *et al.* Crystal structure of RlmA<sup>I</sup>: Implications for understanding the 23S rRNA G<sup>745</sup>/G<sup>748</sup>-methylation at the macrolide antibiotic-binding site. *Proc. Natl. Acad. Sci. USA.* **101**, 4041–4046 (2004).
  27. Madsen, C. T., Mengel-Jorgensen, J., Kirpekar, F. & Douthwaite, S. Identifying the methyltransferases for m<sup>5</sup>U<sup>747</sup> and m<sup>5</sup>U<sup>1939</sup> in 23S rRNA using MALDI mass spectrometry. *Nucleic Acids Res.* **31**, 4738–4746 (2003).
  28. Lee, T. T., Agarwalla, S. & Stroud, R. M. Crystal structure of RumA, an iron-sulfur cluster containing E. coli ribosomal RNA 5-methyluridine methyltransferase. *Structure* **12**, 397–407 (2004).
  29. Sunita, S. *et al.* Crystal structure of the Escherichia coli 23S rRNA:m<sup>5</sup>C methyltransferase RlmI (YccW) reveals evolutionary links between RNA modification enzymes. *J. Mol. Biol.* **383**, 652–666 (2008).
  30. Boal, A. K. *et al.* Structural basis for methyl transfer by a radical SAM enzyme. *Science* **332**, 544–545 (2011).
  31. Kimura, S. & Suzuki, T. Fine-tuning of the ribosomal decoding center by conserved methyl-modifications in the Escherichia coli 16S rRNA. *Nucleic Acids Res.* **38**, 1341–1352 (2010).
  32. Giessing, A. M. *et al.* Identification of 8-methyladenosine as the modification catalyzed by the radical SAM methyltransferase Cfr that confers antibiotic resistance in bacteria. *RNA* **15**, 327–336 (2009).
  33. Basturea, G. N., Dague, D. R., Deutscher, M. P. & Rudd, K. E. YhiQ is RsmJ, the methyltransferase responsible for methylation of G<sup>1516</sup> in 16S rRNA of E. coli. *J. Mol. Biol.* **415**, 16–21 (2012).
  34. Kimura, S. *et al.* Base methylations in the double-stranded RNA by a fused methyltransferase bearing unwinding activity. *Nucleic Acids Res.* **40**, 4071–4085 (2012).
  35. Timinskas, A., Butkus, V. & Janulaitis, A. Sequence motifs characteristic for DNA [cytosine-N4] and DNA [adenine-N6] methyltransferases. Classification of all DNA methyltransferases. *Gene* **157**, 3–11 (1995).
  36. Labahn, J. *et al.* Three-dimensional structure of the adenine-specific DNA methyltransferase M.Taq I in complex with the cofactor S-adenosylmethionine. *Proc. Natl. Acad. Sci. USA* **91**, 10957–61 (1994).

37. Anton, B. P. *et al.* RimO, a MiaB-like enzyme, methylthiolates the universally conserved Asp88 residue of ribosomal protein S12 in *Escherichia coli*. *Proc. Natl. Acad. Sci. USA* **105**, 1826–1831 (2008).
38. Demirci, H., Gregory, S. T., Dahlberg, A. E. & Jogl, G. Multiple-site trimethylation of ribosomal protein L11 by the PrmA methyltransferase. *Structure* **16**, 1059–1066 (2008).
39. Prabhakaran, P. C., Woo, N. T., Yorgey, P. S. & Gould, S. J. Biosynthesis of blasticidin S from L-alpha-arginine. Stereochemistry in the arginine 2,3-aminomutase reaction, *J. Am. Chem. Soc.* **110**, 5785–5791 (1988).
40. Ruzicka, F. J. & Frey, P. A. Glutamate 2,3-aminomutase: A new member of the radical SAM superfamily of enzymes. *BBA - Proteins and Proteomics* **1774**, 286–296 (2007).
41. Fu, Z. *et al.* Crystal Structure of glycine N-methyltransferase from Rat Liver. *Biochemistry* **35**, 11985–93 (1996).
42. Zhang, Q. *et al.* Characterization of NocL involved in thiopeptide nocathiacin I biosynthesis: A [4Fe–4S] cluster and the catalysis of a radical S-adenosylmethionine enzyme. *J. Biol. Chem.* **286**, 21287–21294 (2011).
43. Nicolet, Y., Zeppieri, L., Amara, P. & Fontecilla-Camps, J. C. Crystal structure of tryptophan lyase (NosL): Evidence for radical formation at the amino group of tryptophan. *Angew. Chem.* **126**, 12034–12038 (2014).
44. Ryttersgaard, C. *et al.* Crystal structure of human L-isoaspartyl methyltransferase. *J. Biol. Chem.* **277**, 10642–6 (2002).
45. Gaston, M. A., Zhang, L., Green-Church, K. B. & Krzycki, J. A. The complete biosynthesis of the genetically encoded amino acid pyrrolysine from lysine. *Nature* **471**, 647–650 (2011).
46. Haft, D. H. & Basu, M. K. Biological systems discovery in silico: Radical S-adenosylmethionine protein families and their target peptides for posttranslational modification. *J. Bacteriol.* **193**, 2745–2755 (2011).
47. Flühe, L. *et al.* Two [4Fe-4S] clusters containing radical SAM enzyme SkfB catalyze thioether bond formation during the maturation of the sporulation killing factor. *J. Am. Chem. Soc.* **35**, 959–962 (2013).
48. Frenzel, T., Zhou, P. & Floss, H. G. Formation of 2-methyltryptophan in the biosynthesis of thiostrepton: Isolation of S-adenosylmethionine: tryptophan 2-methyltransferase. *Arch. Biochem. Biophys.* **278**, 35–40 (1990).
49. Djordjevic, S. & Stock, A. M. Crystal structure of the chemotaxis receptor methyltransferase CheR suggests a conserved structural motif for binding S-adenosylmethionine. *Structure* **5**, 545–58 (1997).

50. Zhu, X. *et al.* Mechanistic understanding of *Pyrococcus horikoshii* Dph2, a [4Fe-4S] enzyme required for diphthamide biosynthesis. *Mol. BioSyst.* **7**, 74–81 (2011).
51. Yanagisawa, T., Sumida, T., Ishii, R., Takemoto, C. & Yokoyama, S. A paralog of lysyl-tRNA synthetase aminoacylates a conserved lysine residue in translation elongation factor P. *Nat. Struct. Mol. Biol.* **17**, 1136–1143 (2010).
52. Feng, Q. *et al.* Methylation of H3-Lysine 79 is mediated by a new family of HMTases without a SET domain. *Curr. Biol.* **12**, 1052–1058 (2002).
53. Bachand, F. Protein arginine methyltransferases: From unicellular eukaryotes to humans. *Eukaryot. Cell* **6**, 889–898 (2007).
54. Lepore, B. W., Ruzicka, F. J., Frey, P. A. & Ringe, D. The X-ray crystal structure of lysine-2,3-aminomutase from *Clostridium subterminale*. *Proc. Natl. Acad. Sci. USA* **102**, 13819–13824 (2005).
55. Nicolet, Y. *et al.* X-ray structure of the [FeFe]-hydrogenase maturase HydE from *Thermotoga maritima*. *J. Biol. Chem.* **283**, 18861–18872 (2008).
56. Dinis, P. *et al.* X-ray crystallographic and EPR spectroscopic analysis of HydG, a maturase in [FeFe]-hydrogenase H-cluster assembly. *Proc. Natl. Acad. Sci. USA* **112**, 1362–1367 (2015).
57. Wiig, J. A., Hu, Y., Lee, C. C. & Ribbe, M. W. Radical SAM-dependent carbon insertion into the nitrogenase M-cluster. *Science* **337**, 1672–1675 (2012).
58. Vevodova, J. *et al.* Structure/function studies on a S-adenosyl-L-methionine-dependent uroporphyrinogen III C methyltransferase (SUMT), a key regulatory enzyme of tetrapyrrole biosynthesis. *J. Mol. Biol.* **344**, 419–433 (2004).
59. Stroupe, M. E., Leech, H. K., Daniels, D. S., Warren, M. J. & Getzoff, E. D. CysG structure reveals tetrapyrrole-binding features and novel regulation of siroheme biosynthesis. *Nat. Struct. Biol.* **10**, 1064–1073 (2003).
60. Deery, E. *et al.* An enzyme-trap approach allows isolation of intermediates in cobalamin biosynthesis. *Nat. Chem. Biol.* **8**, 933–940 (2012).
61. Layer, G., Moser, J., Heinz, D. W., Jahn, D. & Schubert, W. D. Crystal structure of coproporphyrinogen III oxidase reveals cofactor geometry of radical SAM enzymes. *EMBO J.* **22**, 6214–24 (2003).
62. Bali, S. *et al.* Molecular hijacking of siroheme for the synthesis of heme and d1 heme. *Proc. Natl. Acad. Sci. USA* **108**, 18260–18265 (2011).
63. Lobo, S. A. *et al.* Characterisation of *Desulfovibrio vulgaris* haem b synthase, a radical SAM family member. *Biochim. Biophys. Acta.* **1844**, 1238–47 (2014).

64. Ouchane, S., Steunou, A. S., Picaud, M. & Astier, C. Aerobic and anaerobic Mg-protoporphyrin monomethyl ester cyclases in purple bacteria a strategy adopted by bypass the repressive oxygen control system. *J. Biol. Chem.* **279**, 6385–6394 (2004).
65. Chew, A. G. M., Frigaard, N. U. & Bryant, D. A. Bacteriochlorophyllide c C-8<sup>2</sup> and C-12<sup>1</sup> methyltransferases are essential for adaptation to low light in *Chlorobaculum tepidum*. *J. Bacteriol.* **189**, 6176–84 (2007).
66. Poon, W. W. *et al.* Yeast and rat Coq3 and *Escherichia coli* UbiG polypeptides catalyze both O-methyltransferase steps in coenzyme Q biosynthesis. *J. Biol. Chem.* **274**, 21665–72 (1999).
67. Lee, P. T., Hsu, A. Y., Ha, H. T. & Clarke, C. F. A C-methyltransferase involved in both ubiquinone and menaquinone biosynthesis: isolation and identification of the *Escherichia coli* ubiE gene. *J. Bacteriol.* **179**, 1748–54 (1997).
68. Mahanta, N., Fedoseyenko, D., Dairi, T. & Begley, T. P. Menaquinone biosynthesis: Formation of aminofutalosine requires a unique radical SAM enzyme. *J. Am. Chem. Soc.* **135**, 15318–15321 (2013).
69. Hiratsuka, T. *et al.* An alternative menaquinone biosynthetic pathway operating in microorganisms. *Science* **321**, 1670–1673 (2008).
70. Meulenbergh, J. J., Sellink, E., Riegman, N. H. & Postma, P. W. Nucleotide sequence and structure of the *Klebsiella pneumoniae* pqq operon. *Mol. Gen. Genet.* **232**, 284–94 (1992).
71. Decamps, L. *et al.* Biosynthesis of F<sub>0</sub>, precursor of the F<sub>420</sub> cofactor, requires a unique two radical-SAM domain enzyme and tyrosine as substrate. *J. Am. Chem. Soc.* **134**, 18173–18176 (2012).
72. Allen, K. D., Xu, H. & White, R. H. Identification of a unique radical S-adenosylmethionine methylase likely involved in methanopterin biosynthesis in *Methanocaldococcus jannaschii*. *J. Bacteriol.* **196**, 3315–3323 (2014).
73. Hänzelmann, P. & Schindelin, H. Crystal structure of the S-adenosylmethionine-dependent enzyme MoaA and its implications for molybdenum cofactor deficiency in humans. *Proc. Natl. Acad. Sci. USA* **101**, 12870–12875 (2004).
74. Sofia, H. J., Chen, G., Hetzler, B. G., Reyes-Spindola, J. F. & Miller, N. E. Radical SAM, a novel protein superfamily linking unresolved steps in familiar biosynthetic pathways with radical mechanisms: Functional characterization using new analysis and information visualization methods. *Nucleic Acids Res.* **29**, 1097–1106 (2001).
75. Martinez-Gomez, N. C., Robers, M. & Downs, D. M. Mutational analysis of ThiH, a member of the radical S-adenosylmethionine (AdoMet) protein Superfamily. *J. Biol. Chem.* **279**, 40505–40510 (2004).

76. Chatterjee, A. *et al.* Reconstitution of ThiC in thiamin pyrimidine biosynthesis expands the radical SAM superfamily. *Nat. Chem. Biol.* **4**, 758–765 (2008).
77. Miller, J. R. *et al.* Escherichia coli LipA is a lipoyl synthase: In vitro biosynthesis of lipoylated pyruvate dehydrogenase complex from octanoyl-acyl carrier protein. *Biochemistry* **39**, 15166–15178 (2000).
78. Berkovitch, F., Nicolet, Y., Wan, J. T., Jarrett, J. T. & Drennan, C. L. Crystal structure of biotin synthase, an S-adenosylmethionine-dependent radical enzyme. *Science* **303**, 76–79 (2004).
79. Welander, P. V., Coleman, M. L., Sessions, A. L., Summons, R. E. & Newman, D.K. Identification of a methylase required for 2-methylhopanoid production and implications for the interpretation of sedimentary hopanes. *Proc. Nat. Acad. Sci. USA* **107**, 8537–8542 (2010).
80. Nakai, T. *et al.* The radical S-adenosyl-L-methionine enzyme QhpD catalyzes sequential formation of intra-protein sulfur-to-methylene carbon thioether bonds. *J. Biol. Chem.* **290**, 11144–66 (2015).
81. Vey, J. L. *et al.* Structural basis for glycyl radical formation by pyruvate formate-lyase activating enzyme. *Proc. Nat. Acad. Sci. USA* **105**, 16137–16141 (2008).
82. Selvaraj, B., Pierik, A. J., Bill, E. & Martins, B. M. 4-Hydroxyphenylacetate decarboxylase activating enzyme catalyses a classical S-adenosylmethionine reductive cleavage reaction. *J. Biol. Inorg. Chem.* **18**, 633–43 (2013).
83. Mulliez, E., Fontecave, M., Gaillard, J. & Reichard, P. An iron-sulfur center and a free radical in the active anaerobic ribonucleotide reductase of Escherichia coli. *J. Biol. Chem.* **268**, 2296–9 (1993).
84. Craciun, S., Marks, J. A. & Balskus, E. P. Characterization of choline trimethylamine-lyase expands the chemistry of glycyl radical enzymes. *ACS Chem. Biol.* **9**, 1408–1413 (2014).
85. Shisler, K. A. & Broderick, J. B. Glycyl radical activating enzymes: Structure, mechanism & substrate interactions. *Arch. Biochem. Biophys.* **546**, 64–71 (2014).
86. Demick, J. M. & Lanzilotta, W. N. Radical SAM activation of the B<sub>12</sub>-independent glycerol dehydratase results in formation of 5'-deoxy-5'-(methylthio)adenosine and not 5'-deoxyadenosine. *Biochemistry* **50**, 440–442 (2011).
87. Fang, Q., Peng, J. & Dierks, T. Post-translational formylglycine modification of bacterial sulfatases by the radical S-adenosylmethionine protein AtsB. *J. Biol. Chem.* **279**, 14570–14578 (2004).
88. Boll, R. *et al.* The active conformation of avilamycin A is conferred by AviX12, a radical AdoMet enzyme. *J. Biol. Chem.* **281**, 14756–14763 (2006).



89. Feng, J. *et al.* Discovery and characterization of BlsE, a radical S-adenosyl-L-methionine decarboxylase involved in the blasticidin S biosynthetic pathway. *PLoS One* **8**, e68545 (2013).
90. Goldman, P. J., Grove, T. L., Booker, S. J. & Drennan, C. L. X-ray analysis of butirosin biosynthetic enzyme BtrN redefines structural motifs for AdoMet radical chemistry. *Proc. Natl. Acad. Sci. USA* **110**, 15949–15954 (2013).
91. Ruszczycky, M. W., Choi, S. H., Mansoorabadi, S. O. & Liu, H. W. Mechanistic studies of the radical S-adenosyl-L-methionine enzyme DesII: EPR characterization of a radical intermediate generated during its catalyzed dehydrogenation of TDP-D-quinovose. *J. Am. Chem. Soc.* **133**, 7292–7295 (2011).
92. Kim, H. J. *et al.* GenK-Catalyzed C-6' Methylation in the biosynthesis of gentamicin: Isolation and characterization of a cobalamin-dependent radical SAM enzyme. *J. Am. Chem. Soc.* **135**, 8093–6 (2013).
93. Kim, J. Y. *et al.* Gene inactivation study of gntE reveals its role in the first step of pseudotrisaccharide modifications in gentamicin biosynthesis. *Biochem. Biophys. Res. Commun.* **372**, 730–734 (2008).
94. Ruszczycky, M. W., Ogasawara, Y. & Liu, H. W. Radical SAM enzymes in the biosynthesis of sugar-containing natural products. *Biochim. Biophys. Acta.* **1824**, 1231–1244 (2012).
95. Werner, W. J. *et al.* In vitro phosphinate methylation by PhpK from Kitasatospora phosalacinea. *Biochemistry* **50**, 8986–8988 (2011).
96. Cai, H. & Clarke, S. A novel methyltransferase catalyzes the methyl esterification of transaconitate in Escherichia coli. *J. Biol. Chem.* **274**, 13470–9 (1999).
97. Marous, D. R., Lloyd, E. P. & Buller, A. R. Consecutive radical S-adenosylmethionine methylations form the ethyl side chain in thienamycin biosynthesis. *Proc. Natl. Acad. Sci. USA* **112**, 10354–10358 (2015).
98. Westrich, L., Heide, L. & Li, S. M. CloN6, a novel methyltransferase catalysing the methylation of the pyrrole-2-carboxyl moiety of clorobiocin. *ChemBioChem* **4**, 768–773 (2003).
99. Morris, R. P. *et al.* Ribosomally synthesized thiopeptide antibiotics targeting elongation factor Tu. *J. Am. Chem. Soc.* **131**, 5946–5955 (2009).
100. Galm, U. *et al.* The biosynthetic gene cluster of zorbamycin, a member of the bleomycin family of antitumor antibiotics, from Streptomyces flavoviridis ATCC 21892. *Mol. BioSyst.* **5**, 77–90 (2009).

101. Yu, Y. *et al.* Nosiheptide biosynthesis featuring a unique indole side ring formation on the characteristic thiopeptide framework. *ACS Chem. Biol.* **4**, 855–864 (2009).
102. Ding, Y. *et al.* Moving posttranslational modifications forward to biosynthesize the glycosylated thiopeptide nocathiacin I in *Nocardia* sp. ATCC202099. *Mol. BioSyst* **6**, 1180–1185 (2010).
103. Huang, W. *et al.* Characterization of yatakemycin gene cluster revealing a radical S-adenosylmethionine dependent methyltransferase and highlighting spirocyclopropane biosynthesis. *J. Am. Chem. Soc.* **134**, 8831–8840 (2012).
104. Flöhe, L. *et al.* The radical SAM enzyme AlbA catalyzes thioether bond formation in subtilosin A. *Nat. Chem. Biol.* **8**, 350–357 (2012).
105. Rea, M. C. *et al.* Thuricin CD, a posttranslationally modified bacteriocin with a narrow spectrum of activity against *Clostridium difficile*. *Proc. Natl. Acad. Sci. USA* **107**, 9352–9357 (2010).
106. Lee, H., Churey, J. J. & Worobo, R. W. Biosynthesis and transcriptional analysis of thurincin H, a tandem repeated bacteriocin genetic locus, produced by *Bacillus thuringiensis* SF361. *FEMS Microbiol. Lett.* **299**, 205–213 (2009).
107. Kneuttinger, A. C., Heil, K., Kashiwazaki, G. & Carell, T. The radical SAM enzyme spore photoproduct lyase employs a tyrosyl radical for DNA repair. *Chem. Comm.* **49**, 722–724 (2013).
108. Paraskevopoulou, C., Fairhurst, S. A., Lowe, D. J., Brick, P. & Onesti, S. The elongator subunit Elp3 contains a Fe<sub>4</sub>S<sub>4</sub> cluster and binds S-adenosylmethionine. *Mol. Microbiol.* **59**, 795–806 (2006).
