# Supplementary material for: The physiology and habitat of the last universal common ancestor
Source: Springer Nature journal article supplement (doi:10.1038/nmicrobiol.2016.116), 2016-07-25
Supplement: 41564_2016_BFnmicrobiol2016116_MOESM154_ESM.xlsx [file 41564_2016_BFnmicrobiol2016116_MOESM154_ESM.xlsx]

## Sheet: table_1mispl
Supplementary Table 8. Functional and taxonomic characterization of one taxa misplaced protein families.
Functional characterization			Taxonomic charaterization
COG-ID	COG category	Product	No. prokaryotic sequences	No. archaeal sequences	No. bacterial sequences	No. prokaryotic groups	No. archaeal groups	No. bacterial groups
COG1475	Cellular (D)	Chromosome segregation protein Spo0J, contains ParB-like nuclease domain	18	5	13	6	2	4
COG1732	Cellular (M)	Periplasmic glycine betaine/choline-binding (lipo)protein of an ABC-type transport system (osmoprotectant binding protein)	295	7	288	22	5	17
COG0438	Cellular (M)	Glycosyltransferase involved in cell wall bisynthesis	172	16	156	16	5	11
COG1044	Cellular (M)	UDP-3-O-[3-hydroxymyristoyl] glucosamine N-acyltransferase	108	46	62	21	9	12
COG0463	Cellular (M)	Glycosyltransferase involved in cell wall bisynthesis	67	23	44	9	3	6
COG0463	Cellular (M)	Glycosyltransferase involved in cell wall bisynthesis	63	36	27	13	6	7
COG0084	Cellular (N)	Tat protein secretion system quality control protein TatD (DNase activity)	1208	61	1147	31	8	23
COG0234	Cellular (O)	Co-chaperonin GroES (HSP10)	1217	9	1208	26	3	23
COG3590	Cellular (O)	Predicted metalloendopeptidase	393	6	387	18	3	15
COG3118	Cellular (O)	Negative regulator of GroEL, contains thioredoxin-like and TPR-like domains	267	8	259	18	4	14
COG0459	Cellular (O)	Chaperonin GroEL (HSP60 family)	161	141	20	19	13	6
COG0492	Cellular (O)	Thioredoxin reductase	138	19	119	17	4	13
COG1225	Cellular (O)	Peroxiredoxin	126	10	116	16	3	13
COG2905	Cellular (T)	Signal-transduction protein containing cAMP-binding, CBS, and nucleotidyltransferase domains	309	12	297	16	4	12
COG4831	Cellular (T)	Roadblock/LC7 domain	27	9	18	5	2	3
COG0805	Cellular (U)	Sec-independent protein secretion pathway component TatC	980	44	936	29	8	21
COG1583	Cellular (V)	CRISPR/Cas system endoribonuclease Cas6, RAMP superfamily	129	26	103	15	5	10
COG4096	Cellular (V)	Type I site-specific restriction endonuclease, part of a restriction-modification system	100	7	93	19	4	15
COG0494	Cellular (V)	8-oxo-dGTP pyrophosphatase MutT and related house-cleaning NTP pyrophosphohydrolases, NUDIX family	56	35	21	12	5	7
COG0534	Cellular (V)	Na+-driven multidrug efflux pump	30	6	24	12	4	8
COG1604	Cellular (V)	CRISPR/Cas system CMR subunit Cmr6, Cas7 group, RAMP superfamily	29	4	25	11	3	8
COG1598	Cellular (V)	Predicted nuclease of the RNAse H fold, HicB family	15	8	7	7	2	5
COG2253	Cellular (V)	Predicted nucleotidyltransferase component of viral defense system	16	8	8	10	5	5
COG0343	Information (J)	Queuine/archaeosine tRNA-ribosyltransferase	1010	4	1006	26	3	23
COG0689	Information (J)	Ribonuclease PH	810	79	731	27	10	17
COG0018	Information (J)	Arginyl-tRNA synthetase	694	62	632	28	9	19
COG0721	Information (J)	Asp-tRNAAsn/Glu-tRNAGln amidotransferase C subunit	637	47	590	24	6	18
COG2872	Information (J)	Ser-tRNA(Ala) deacylase AlaX (editing enzyme)	39	14	25	8	2	6
COG1802	Information (K)	DNA-binding transcriptional regulator, GntR family	685	11	674	21	4	17
COG0640	Information (K)	DNA-binding transcriptional regulator, ArsR family	170	5	165	17	2	15
COG0789	Information (K)	DNA-binding transcriptional regulator, MerR family	90	9	81	14	4	10
COG1693	Information (K)	Repressor of nif and glnA expression	34	24	10	10	6	4
COG0640	Information (K)	DNA-binding transcriptional regulator, ArsR family	25	10	15	8	3	5
COG1273	Information (L)	Non-homologous end joining protein Ku, dsDNA break repair	388	5	383	14	3	11
COG0863	Information (L)	DNA modification methylase	135	8	127	22	4	18
COG1525	Information (L)	Endonuclease YncB, thermonuclease family	80	25	55	15	4	11
COG0687	Metabolism (E)	Spermidine/putrescine-binding periplasmic protein	847	11	836	25	4	21
COG1364	Metabolism (E)	N-acetylglutamate synthase (N-acetylornithine aminotransferase)	766	43	723	28	7	21
COG1984	Metabolism (E)	Allophanate hydrolase subunit 2	530	15	515	20	3	17
COG0367	Metabolism (E)	Asparagine synthetase B (glutamine-hydrolyzing)	259	37	222	21	5	16
COG0747	Metabolism (E)	ABC-type transport system, periplasmic component	95	11	84	15	4	11
COG0067	Metabolism (E)	Glutamate synthase domain 1	83	13	70	10	5	5
COG0076	Metabolism (E)	Glutamate or tyrosine decarboxylase or a related PLP-dependent protein	54	9	45	12	5	7
COG0531	Metabolism (E)	Amino acid transporter	29	8	21	8	3	5
COG0119	Metabolism (E)	Isopropylmalate/homocitrate/citramalate synthases	33	7	26	8	2	6
COG4690	Metabolism (E)	Dipeptidase	22	6	16	12	4	8
COG0747	Metabolism (E)	ABC-type transport system, periplasmic component	24	8	16	7	4	3
COG0519	Metabolism (F)	GMP synthase, PP-ATPase domain/subunit	1128	102	1026	36	13	23
COG1828	Metabolism (F)	Phosphoribosylformylglycinamidine (FGAM) synthase, PurS component	475	13	462	20	4	16
COG3199	Metabolism (F)	Predicted polyphosphate- or ATP-dependent NAD kinase	109	65	44	12	8	4
COG0572	Metabolism (F)	Uridine kinase	34	12	22	7	4	3
COG2079	Metabolism (G)	2-methylcitrate dehydratase PrpD	146	11	135	18	4	14
COG0524	Metabolism (G)	Sugar or nucleoside kinase, ribokinase family	199	5	194	17	3	14
COG2271	Metabolism (G)	Sugar phosphate permease	92	4	88	11	2	9
COG1850	Metabolism (G)	Ribulose 1,5-bisphosphate carboxylase, large subunit, or a RuBisCO-like protein	160	61	99	18	10	8
COG0057	Metabolism (G)	Glyceraldehyde-3-phosphate dehydrogenase/erythrose-4-phosphate dehydrogenase	131	114	17	21	13	8
COG2079	Metabolism (G)	2-methylcitrate dehydratase PrpD	102	12	90	15	4	11
COG1449	Metabolism (G)	Alpha-amylase/alpha-mannosidase, GH57 family	92	60	32	14	9	5
COG2133	Metabolism (G)	Glucose/arabinose dehydrogenase, beta-propeller fold	85	13	72	17	3	14
COG0058	Metabolism (G)	Glucan phosphorylase	33	27	6	8	4	4
COG3934	Metabolism (G)	Endo-1,4-beta-mannosidase	30	10	20	8	4	4
COG0395	Metabolism (G)	ABC-type glycerol-3-phosphate transport system, permease component	35	14	21	12	4	8
COG0181	Metabolism (H)	Porphobilinogen deaminase	1019	93	926	34	13	21
COG0214	Metabolism (H)	Pyridoxal biosynthesis lyase PdxS	465	107	358	28	13	15
COG4822	Metabolism (H)	Cobalamin biosynthesis protein CbiK, Co2+ chelatase	117	5	112	14	3	11
COG0314	Metabolism (H)	Molybdopterin synthase catalytic subunit	70	25	45	11	4	7
COG1809	Metabolism (H)	Phosphosulfolactate synthase, CoM biosynthesis protein A	83	21	62	12	3	9
COG1011	Metabolism (H)	FMN phosphatase YigB, HAD superfamily	33	7	26	11	2	9
COG4032	Metabolism (H)	Sulfopyruvate decarboxylase, TPP-binding subunit (coenzyme M biosynthesis)	50	23	27	12	4	8
COG0619	Metabolism (H)	Energy-coupling factor transporter transmembrane protein EcfT	38	16	22	11	6	5
COG2226	Metabolism (H)	Ubiquinone/menaquinone biosynthesis C-methylase UbiE	36	11	25	9	3	6
COG1865	Metabolism (H)	Adenosylcobinamide amidohydrolase	25	8	17	11	3	8
COG2227	Metabolism (H)	2-polyprenyl-3-methyl-5-hydroxy-6-metoxy-1,4-benzoquinol methylase	16	4	12	11	3	8
COG1257	Metabolism (I)	Hydroxymethylglutaryl-CoA reductase	144	94	50	19	10	9
COG1884	Metabolism (I)	Methylmalonyl-CoA mutase, N-terminal domain/subunit	97	24	73	12	3	9
COG3158	Metabolism (P)	K+ transporter	530	5	525	19	2	17
COG0569	Metabolism (P)	Trk K+ transport system, NAD-binding component	100	10	90	6	3	3
COG0003	Metabolism (P)	Anion-transporting ATPase, ArsA/GET3 family	92	7	85	15	3	12
COG0659	Metabolism (P)	Sulfate permease or related transporter, MFS superfamily	56	21	35	12	4	8
COG1178	Metabolism (P)	ABC-type Fe3+ transport system, permease component	53	26	27	13	4	9
COG0656	Metabolism (Q)	Aldo/keto reductase, related to diketogulonate reductase	265	66	199	22	7	15
COG2366	Metabolism (Q)	Acyl-homoserine lactone (AHL) acylase PvdQ	321	13	308	21	5	16
COG1853	Metabolism (C)	NADH-FMN oxidoreductase RutF, flavin reductase (DIM6/NTAB) family	430	12	418	17	4	13
COG0674	Metabolism (C)	Pyruvate:ferredoxin oxidoreductase or related 2-oxoacid:ferredoxin oxidoreductase, alpha subunit	168	20	148	16	4	12
COG0674	Metabolism (C)	Pyruvate:ferredoxin oxidoreductase or related 2-oxoacid:ferredoxin oxidoreductase, alpha subunit	37	29	8	10	7	3
COG1142	Metabolism (C)	Fe-S-cluster-containing hydrogenase component 2	35	22	13	8	5	3
COG1173	not_declared (EP)	ABC-type dipeptide/oligopeptide/nickel transport system, permease component	58	6	52	10	4	6
COG0444	not_declared (EP)	ABC-type dipeptide/oligopeptide/nickel transport system, ATPase component	33	11	22	8	3	5
COG1173	not_declared (EP)	ABC-type dipeptide/oligopeptide/nickel transport system, permease component	23	5	18	9	2	7
COG0834	not_declared (ET)	ABC-type amino acid transport/signal transduction system, periplasmic component/domain	182	6	176	20	4	16
COG0637	not_declared (GR)	Beta-phosphoglucomutase or related phosphatase, HAD superfamily	218	8	210	20	3	17
COG0301	not_declared (HJ)	Adenylyl- and sulfurtransferase ThiI, participates in tRNA 4-thiouridine and thiamine biosynthesis	159	20	139	8	4	4
COG1208	not_declared (JM)	NDP-sugar pyrophosphorylase, includes eIF-2Bgamma, eIF-2Bepsilon, and LPS biosynthesis proteins	373	29	344	22	5	17
COG1061	not_declared (KL)	Superfamily II DNA or RNA helicase	94	66	28	17	10	7
COG4948	not_declared (MR)	L-alanine-DL-glutamate epimerase or related enzyme of enolase superfamily	14	4	10	9	3	6
COG1540	poorly_characterised (R)	Lactam utilization protein B (function unknown)	561	15	546	20	3	17
COG0667	poorly_characterised (R)	Predicted oxidoreductase (related to aryl-alcohol dehydrogenase)	301	4	297	16	3	13
COG0375	poorly_characterised (R)	Zn finger protein HypA/HybF (possibly regulating hydrogenase expression)	290	22	268	20	4	16
COG0714	poorly_characterised (R)	MoxR-like ATPase	109	7	102	12	3	9
COG0110	poorly_characterised (R)	Acetyltransferase (isoleucine patch superfamily)	112	27	85	11	3	8
COG1031	poorly_characterised (R)	Radical SAM superfamily enzyme with C-terminal helix-hairpin-helix motif	116	92	24	16	11	5
COG1917	poorly_characterised (R)	Cupin domain protein related to quercetin dioxygenase	73	22	51	11	4	7
COG4087	poorly_characterised (R)	Soluble P-type ATPase	69	20	49	10	2	8
COG3970	poorly_characterised (R)	Fumarylacetoacetate (FAA) hydrolase family protein	57	19	38	12	3	9
COG3382	poorly_characterised (R)	B3/B4 domain (DNA/RNA-binding domain of Phe-tRNA-synthetase)	48	32	16	10	7	3
COG3864	poorly_characterised (R)	Predicted metal-dependent peptidase	40	3	37	9	3	6
COG2129	poorly_characterised (R)	Predicted phosphoesterase, related to the Icc protein	18	11	7	8	4	4
COG1708	poorly_characterised (R)	Predicted nucleotidyltransferase	22	8	14	8	4	4
COG1641	poorly_characterised (S)	Uncharacterized conserved protein, DUF111 family	298	68	230	24	10	14
COG3272	poorly_characterised (S)	Uncharacterized conserved protein YbgA, DUF1722 family	217	21	196	18	5	13
COG1548	poorly_characterised (S)	Uncharacterized protein, hydantoinase/oxoprolinase family	83	42	41	12	7	5
unknown	poorly_characterised (S)	unknown	62	4	58	10	3	7
COG1906	poorly_characterised (S)	Uncharacterized protein	66	26	40	12	7	5
unknown	poorly_characterised (S)	unknown	29	14	15	9	3	6
unknown	poorly_characterised (S)	unknown	29	10	19	11	4	7
COG2855	poorly_characterised (S)	Uncharacterized membrane protein YadS	36	13	23	9	2	7
unknown	poorly_characterised (S)	unknown	36	6	30	12	2	10
COG1808	poorly_characterised (S)	Uncharacterized membrane protein	32	15	17	13	3	10
unknown	poorly_characterised (S)	unknown	30	8	22	5	2	3
unknown	poorly_characterised (S)	unknown	26	8	18	8	3	5
unknown	poorly_characterised (S)	unknown	20	7	13	9	3	6
COG5015	poorly_characterised (S)	Uncharacterized protein, pyridoxamine 5'-phosphate oxidase (PNPOx-like) family	18	8	10	7	4	3
COG3339	poorly_characterised (S)	Uncharacterized membrane protein YkvA, DUF1232 family	14	5	9	8	2	6
COG3832	poorly_characterised (S)	Uncharacterized conserved protein YndB, AHSA1/START domain	71	5	66	13	3	10
