# Supplementary material for: The physiology and habitat of the last universal common ancestor
Source: Springer Nature journal article supplement (doi:10.1038/nmicrobiol.2016.116), 2016-07-25
Supplement: 41564_2016_BFnmicrobiol2016116_MOESM155_ESM.xlsx [file 41564_2016_BFnmicrobiol2016116_MOESM155_ESM.xlsx]

## Sheet: table_clademispl
Supplementary Table 9. Functional and taxonomic characterization of one phyla misplaced protein families.
Functional characterization			Taxonomic charaterization
COG-ID	COG category	Product	No. prokaryotic sequences	No. archaeal sequences	No. bacterial sequences	No. prokaryotic groups	No. archaeal groups	No. bacterial groups
COG0451	Cellular (M)	Nucleoside-diphosphate-sugar epimerase	339	24	315	21	5	16
COG0438	Cellular (M)	Glycosyltransferase involved in cell wall bisynthesis	164	5	159	16	2	14
COG0451	Cellular (M)	Nucleoside-diphosphate-sugar epimerase	93	82	11	18	10	8
COG0438	Cellular (M)	Glycosyltransferase involved in cell wall bisynthesis	62	4	58	17	2	15
COG0463	Cellular (M)	Glycosyltransferase involved in cell wall bisynthesis	65	33	32	16	7	9
COG1215	Cellular (N)	Glycosyltransferase, catalytic subunit of cellulose synthase and poly-beta-1,6-N-acetylglucosamine synthase	85	16	69	8	3	5
COG0826	Cellular (O)	Collagenase-like protease, PrtC family	515	26	489	21	3	18
COG0309	Cellular (O)	Hydrogenase maturation factor	449	75	374	30	13	17
COG1277	Cellular (O)	ABC-type transport system involved in multi-copper enzyme maturation, permease component	90	10	80	7	3	4
COG1567	Cellular (V)	CRISPR/Cas system CSM-associated protein Csm4, group 5 of RAMP superfamily	37	10	27	10	5	5
COG0842	Cellular (V)	ABC-type multidrug transport system, permease component	35	24	11	9	5	4
COG0060	Information (J)	Isoleucyl-tRNA synthetase	469	96	373	28	12	16
COG2872	Information (J)	Ser-tRNA(Ala) deacylase AlaX (editing enzyme)	158	53	105	14	7	7
COG1921	Information (J)	Seryl-tRNA(Sec) selenium transferase	73	5	68	11	3	8
COG0017	Information (J)	Aspartyl/asparaginyl-tRNA synthetase	36	24	12	8	4	4
COG1846	Information (K)	DNA-binding transcriptional regulator, MarR family	16	9	7	7	3	4
COG0550	Information (L)	DNA topoisomerase IA	574	6	568	19	3	16
COG1143	Metabolism (C)	Formate hydrogenlyase subunit 6/NADH:ubiquinone oxidoreductase 23 kD subunit (chain I)	728	61	667	26	7	19
COG1139	Metabolism (C)	L-lactate utilization protein LutB, contains a ferredoxin-type domain	426	36	390	22	7	15
COG0431	Metabolism (C)	NAD(P)H-dependent FMN reductase	439	6	433	22	4	18
COG0655	Metabolism (C)	Multimeric flavodoxin WrbA	67	28	39	9	4	5
COG0778	Metabolism (C)	Nitroreductase	62	13	49	11	3	8
COG1620	Metabolism (C)	L-lactate permease	30	6	24	6	2	4
COG2041	Metabolism (C)	Periplasmic DMSO/TMAO reductase YedYZ, molybdopterin-dependent catalytic subunit	161	6	155	13	3	10
COG1319	Metabolism (C)	CO or xanthine dehydrogenase, FAD-binding subunit	173	8	165	14	3	11
COG0243	Metabolism (C)	Anaerobic selenocysteine-containing dehydrogenase	137	21	116	10	4	6
COG1176	Metabolism (E)	ABC-type spermidine/putrescine transport system, permease component I	833	21	812	24	3	21
COG1177	Metabolism (E)	ABC-type spermidine/putrescine transport system, permease component II	754	16	738	25	4	21
COG4176	Metabolism (E)	ABC-type proline/glycine betaine transport system, permease component	428	13	415	18	3	15
COG4175	Metabolism (E)	ABC-type proline/glycine betaine transport system, ATPase component	393	13	380	18	3	15
COG0405	Metabolism (E)	Gamma-glutamyltranspeptidase	462	40	422	24	6	18
COG2355	Metabolism (E)	Zn-dependent dipeptidase, microsomal dipeptidase homolog	333	40	293	21	5	16
COG0119	Metabolism (E)	Isopropylmalate/homocitrate/citramalate synthases	341	26	315	22	4	18
COG2113	Metabolism (E)	ABC-type proline/glycine betaine transport system, periplasmic component	185	19	166	14	3	11
COG0624	Metabolism (E)	Acetylornithine deacetylase/Succinyl-diaminopimelate desuccinylase or related deacylase	168	11	157	16	5	11
COG1280	Metabolism (E)	Threonine/homoserine/homoserine lactone efflux protein	175	15	160	15	3	12
COG0624	Metabolism (E)	Acetylornithine deacetylase/Succinyl-diaminopimelate desuccinylase or related deacylase	89	59	30	13	8	5
COG0683	Metabolism (E)	ABC-type branched-chain amino acid transport system, periplasmic component	69	16	53	13	4	9
COG1171	Metabolism (E)	Threonine dehydratase	65	7	58	12	3	9
COG0813	Metabolism (F)	Purine-nucleoside phosphorylase	476	57	419	21	5	16
COG0046	Metabolism (F)	Phosphoribosylformylglycinamidine (FGAM) synthase, synthetase domain	61	8	53	9	3	6
COG0528	Metabolism (F)	Uridylate kinase	34	4	30	9	2	7
COG1472	Metabolism (G)	Periplasmic beta-glucosidase and related glycosidases	435	21	414	17	3	14
COG1064	Metabolism (G)	D-arabinose 1-dehydrogenase, Zn-dependent alcohol dehydrogenase family	388	5	383	18	3	15
COG1501	Metabolism (G)	Alpha-glucosidase, glycosyl hydrolase family GH31	247	22	225	18	3	15
COG3769	Metabolism (G)	Predicted mannosyl-3-phosphoglycerate phosphatase, HAD superfamily	110	17	93	13	4	9
COG3408	Metabolism (G)	Glycogen debranching enzyme (alpha-1,6-glucosidase)	129	25	104	19	6	13
COG0524	Metabolism (G)	Sugar or nucleoside kinase, ribokinase family	101	12	89	10	3	7
COG0524	Metabolism (G)	Sugar or nucleoside kinase, ribokinase family	45	17	28	13	4	9
COG2814	Metabolism (G)	Predicted arabinose efflux permease, MFS family	32	21	11	10	4	6
COG2814	Metabolism (G)	Predicted arabinose efflux permease, MFS family	34	8	26	8	3	5
COG2814	Metabolism (G)	Predicted arabinose efflux permease, MFS family	30	12	18	8	4	4
COG0113	Metabolism (H)	Delta-aminolevulinic acid dehydratase, porphobilinogen synthase	1055	96	959	35	13	22
COG0294	Metabolism (H)	Dihydropteroate synthase	1008	33	975	29	6	23
COG0413	Metabolism (H)	Ketopantoate hydroxymethyltransferase	965	67	898	27	6	21
COG0157	Metabolism (H)	Nicotinate-nucleotide pyrophosphorylase	931	90	841	35	13	22
COG1239	Metabolism (H)	Mg-chelatase subunit ChlI	182	19	163	20	6	14
COG0043	Metabolism (H)	3-polyprenyl-4-hydroxybenzoate decarboxylase	133	68	65	18	10	8
COG1239	Metabolism (H)	Mg-chelatase subunit ChlI	127	42	85	17	9	8
COG2226	Metabolism (H)	Ubiquinone/menaquinone biosynthesis C-methylase UbiE	21	11	10	6	3	3
COG3425	Metabolism (I)	3-hydroxy-3-methylglutaryl CoA synthase	164	26	138	16	3	13
COG1562	Metabolism (I)	Phytoene/squalene synthetase	74	8	66	7	3	4
COG0183	Metabolism (I)	Acetyl-CoA acetyltransferase	70	19	51	7	4	3
COG1024	Metabolism (I)	Enoyl-CoA hydratase/carnithine racemase	26	9	17	7	3	4
COG1283	Metabolism (P)	Na+/phosphate symporter	230	7	223	20	4	16
COG0306	Metabolism (P)	Phosphate/sulfate permease	34	11	23	9	3	6
COG0179	Metabolism (Q)	2-keto-4-pentenoate hydratase/2-oxohepta-3-ene-1,7-dioic acid hydratase (catechol pathway)	582	13	569	18	3	15
COG0785	not_declared (CO)	Cytochrome c biogenesis protein CcdA	472	8	464	20	3	17
COG1138	not_declared (CO)	Cytochrome c biogenesis factor	430	10	420	16	2	14
COG1668	not_declared (CP)	ABC-type Na+ efflux pump, permease component	179	11	168	13	4	9
COG1063	not_declared (ER)	Threonine dehydrogenase or related Zn-dependent dehydrogenase	167	9	158	17	3	14
COG1682	not_declared (GM)	ABC-type polysaccharide/polyol phosphate export permease	138	11	127	14	3	11
COG1335	not_declared (HR)	Nicotinamidase-related amidase	447	17	430	22	4	18
COG0596	not_declared (HR)	Pimeloyl-ACP methyl ester carboxylesterase	105	7	98	14	3	11
COG0596	not_declared (HR)	Pimeloyl-ACP methyl ester carboxylesterase	31	4	27	7	2	5
COG1940	not_declared (KG)	Sugar kinase of the NBD/HSP70 family, may contain an N-terminal HTH domain	627	52	575	27	5	22
COG4948	not_declared (MR)	L-alanine-DL-glutamate epimerase or related enzyme of enolase superfamily	76	7	69	12	4	8
COG1352	not_declared (NT)	Methylase of chemotaxis methyl-accepting proteins	935	54	881	25	7	18
COG1062	poorly_characterised (R)	Zn-dependent alcohol dehydrogenase	661	14	647	15	2	13
COG0667	poorly_characterised (R)	Predicted oxidoreductase (related to aryl-alcohol dehydrogenase)	638	7	631	26	4	22
COG2316	poorly_characterised (R)	Predicted hydrolase, HD superfamily	209	9	200	17	4	13
COG1458	poorly_characterised (R)	Predicted DNA-binding protein containing PIN domain, UPF0278 family	76	63	13	11	8	3
COG0599	poorly_characterised (R)	Uncharacterized conserved protein YurZ, alkylhydroperoxidase/carboxymuconolactone decarboxylase family	27	7	20	9	3	6
COG1724	poorly_characterised (R)	Predicted RNA binding protein YcfA, dsRBD-like fold, HicA-like mRNA interferase family	22	6	16	13	3	10
COG1392	poorly_characterised (S)	Uncharacterized conserved protein YkaA, distantly related to PhoU, UPF0111/DUF47 family	117	23	94	11	5	6
COG2461	poorly_characterised (S)	Uncharacterized conserved protein, DUF438 domain, may contain hemerythrin domain	126	16	110	17	5	12
COG5658	poorly_characterised (S)	Uncharacterized membrane protein	110	8	102	14	3	11
unknown	poorly_characterised (S)	unknown	94	21	73	10	2	8
COG3326	poorly_characterised (S)	Uncharacterized membrane protein YsdA, DUF1294 family	65	10	55	7	2	5
COG1891	poorly_characterised (S)	Uncharacterized protein, UPF0264 family	77	42	35	13	7	6
unknown	poorly_characterised (S)	unknown	56	29	27	7	3	4
COG5423	poorly_characterised (S)	Predicted metal-binding protein	50	33	17	11	7	4
COG2445	poorly_characterised (S)	Uncharacterized conserved protein YutE, UPF0331/DUF86 family	34	11	23	10	4	6
COG3344	not_declared (X)	Retron-type reverse transcriptase	116	9	107	16	2	14
